# Supplementary material for: Visual dual dot immunoassay for the simultaneous detection of kanamycin and streptomycin in milk
Source: Royal Society of Chemistry journal article supplement (doi:10.1039/c8ay02006j), 2018-11-26
Supplement: c8ay02006j1.pdf [file c8ay02006j1.pdf]

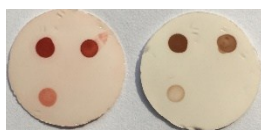

Figure S1 Comparison of the results using DAB and AEC as chromogenic substrate.

Left: with AEC; Right: with DAB.

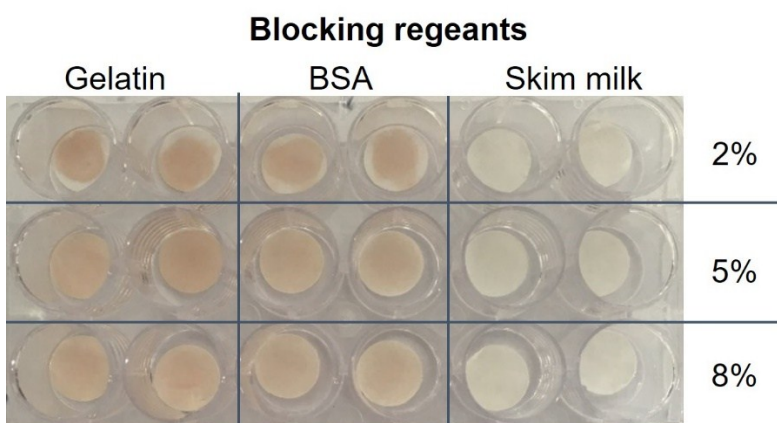

Figure S2. Optimization of blocking agents.

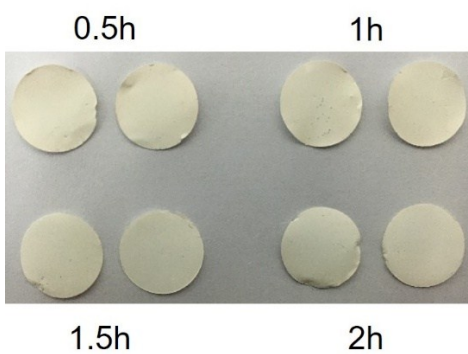

Figure S3. Optimization of blocking time.

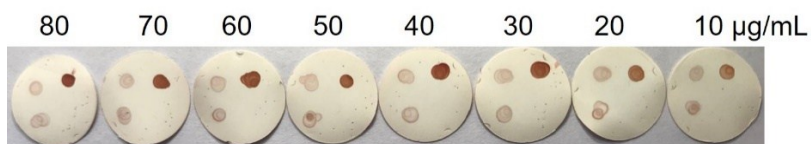

Figure S4. Optimization of goat anti-mouse antibody as the positive control.

Table S1 Cross-reactivity of mAb-KAN with analogs

| Antibiotics         | IC <sub>50</sub> (ng/mL) | Cross-reactivity (%) |
|---------------------|--------------------------|----------------------|
| Kanamycin           | 2.15                     | 100%                 |
| Tobramycin          | 2.17                     | 99.07%               |
| Amikacin            | 978.70                   | 0.22                 |
| Streptomycin        | 13285.81                 | 0.02                 |
| Dihydrostreptomycin | >20,000                  | <0.01                |
| Neomycin            | >20,000                  | <0.01                |
| Gentamicin          | >20,000                  | <0.01                |

Table S2. Comparison of Dual Dot-ELISA and UPLC-MS/MS Using Random Spiked

Samples

| Spiked samples |                                                                                     | Dual Dot-ELISA |              | UPLC-MS/MS   |              |
|----------------|-------------------------------------------------------------------------------------|----------------|--------------|--------------|--------------|
|                |                                                                                     | KAN (ng/mL)    | STR (ng/mL)  | KAN (ng/mL)  | STR (ng/mL)  |
| 1              |    | 30.25 ± 2.21   | 55.32 ± 4.18 | 38.41 ± 3.23 | 42.72 ± 5.52 |
| 2              |    | 35.23 ± 2.35   | 4.66 ± 0.21  | 26.93 ± 2.32 | 6.61 ± 0.53  |
| 3              |    | 0.52 ± 0.03    | 4.14 ± 0.14  | ND           | 6.35 ± 0.32  |
| 4              |   | 1.52 ± 0.11    | 15.34 ± 1.63 | 3.62 ± 0.25  | 10.32 ± 1.12 |
| 5              |  | 44.62 ± 7.35   | 11.35 ± 1.19 | 56.13 ± 7.28 | 16.63 ± 1.54 |
| 6              |  | 4.73 ± 0.32    | 46.14 ± 0.35 | 6.64 ± 0.54  | 53.42 ± 4.89 |
| 7              |  | 0.31 ± 0.01    | 55.32 ± 0.92 | ND           | 62.17 ± 5.21 |
| 8              |  | 41.62 ± 0.38   | ND           | 48.92 ± 5.68 | ND           |
| 9              |  | 1.31 ± 0.13    | 2.31 ± 0.56  | 2.67 ± 0.18  | 5.31 ± 0.31  |

ND: not detected.
